# Supplementary material for: Finding Lead Compounds for Dengue Antivirals from a Collection of Old Drugs through In Silico Target Prediction and Subsequent In Vitro Validation
Source: PubMed Central journal article supplement — ACS Omega. 2023 Aug 28;8(36):32483–97. doi: 10.1021/acsomega.3c02607 (PMC10500654; doi:10.1021/acsomega.3c02607), 2023-08-28
Supplement: ao3c02607_si_001.pdf [file ao3c02607_si_001.pdf]

## Supporting information

### **Finding lead compounds for dengue antivirals from a collection of old drugs through *in silico* target prediction and subsequent *in vitro* validation**

**Zafirah Liyana Abdullah<sup>1</sup>, Hui-Yee Chee<sup>2</sup>, Rohana Yusof<sup>3</sup>, Fazlin Mohd Fauzi<sup>4, 5\*</sup>**

<sup>1</sup>Department of Pharmaceutical Life Sciences, Faculty of Pharmacy, Universiti Teknologi MARA Selangor, Puncak Alam Campus, 42300 Bandar Puncak Alam, Selangor, Malaysia.

<sup>2</sup>Department of Medical Microbiology, Faculty of Medicine and Health Sciences, Universiti Putra Malaysia, 43400 UPM Serdang, Selangor, Malaysia.

<sup>3</sup>Department of Molecular Medicine, Faculty of Medicine, University of Malaya, 50603 Kuala Lumpur, Malaysia.

<sup>4</sup>Department of Pharmacology and Pharmaceutical Chemistry, Faculty of Pharmacy, UiTM Selangor, Puncak Alam Campus, 42300 Bandar Puncak Alam, Selangor.

<sup>5</sup>Collaborative Drug Discovery Research, Faculty of Pharmacy, Universiti Teknologi MARA Selangor, Puncak Alam Campus, 42300 Bandar Puncak Alam, Selangor, Malaysia

\*Correspondence:

Fazlin Mohd Fauzi

[fazlin5465@uitm.edu.my](mailto:fazlin5465@uitm.edu.my)

Keywords: *in silico*; antiviral; dengue virus; NS2B-NS3 protease; lead compounds

## Table of Contents

|                                                                                                                      |    |
|----------------------------------------------------------------------------------------------------------------------|----|
| <b><i>Supplementary tables</i></b> .....                                                                             | 3  |
| Variance percentage of the first 10 Principal Components (PCs) .....                                                 | 3  |
| The eigenvalues of the training set according to the chemical structures from PCA .....                              | 3  |
| <b><i>Supplementary figures</i></b> .....                                                                            | 15 |
| Chemical space visualization using PCA .....                                                                         | 15 |
| Scatter plot of PCA of screened drugs and active compounds of P14337 (dengue NS3 protein) from the training set..... | 16 |

## Supporting Information S1

### Supplementary tables

Variance percentage of the first 10 Principal Components (PCs)

**Table S1. Explained variance percentage of the first 10 Principal Components (PCs).**

| PCs                                   | Value  |
|---------------------------------------|--------|
| Explained variance percentage of PC1  | 19.217 |
| Explained variance percentage of PC2  | 5.348  |
| Explained variance percentage of PC3  | 5.092  |
| Explained variance percentage of PC4  | 3.226  |
| Explained variance percentage of PC5  | 2.625  |
| Explained variance percentage of PC6  | 2.227  |
| Explained variance percentage of PC7  | 2.04   |
| Explained variance percentage of PC8  | 1.872  |
| Explained variance percentage of PC9  | 1.697  |
| Explained variance percentage of PC10 | 1.549  |

The eigenvalues of the training set according to the chemical structures from PCA

**Table S2. The eigenvalues of the training set according to the chemical structures.** The eigenvalues describe the total variance explained by each principal component. There were 512-bit binary string with respective PCAs value.

| Variable Name                        | pc1      | pc2      | pc3       |
|--------------------------------------|----------|----------|-----------|
| Structure of smiles [FragFp] bit 0   | 0.019613 | -0.06599 | 0.039135  |
| Structure of smiles [FragFp] bit 1   | 0.075367 | 0.009896 | 0.005492  |
| Structure of smiles [FragFp] bit 10  | 0.051698 | -0.07758 | 0.018239  |
| Structure of smiles [FragFp] bit 100 | 0.072073 | -0.01529 | 0.021822  |
| Structure of smiles [FragFp] bit 101 | 0.046917 | 0.002419 | -0.02372  |
| Structure of smiles [FragFp] bit 102 | 0.063902 | -0.02106 | 0.029623  |
| Structure of smiles [FragFp] bit 103 | -0.02278 | -0.00604 | 0.122796  |
| Structure of smiles [FragFp] bit 104 | 0.034826 | 0.060547 | 0.018474  |
| Structure of smiles [FragFp] bit 105 | 0.063278 | -0.04539 | 0.034258  |
| Structure of smiles [FragFp] bit 106 | 0.073721 | 0.01903  | 0.001499  |
| Structure of smiles [FragFp] bit 107 | 0.071974 | 0.027832 | 0.014552  |
| Structure of smiles [FragFp] bit 108 | 0.009034 | 0.020733 | -0.00982  |
| Structure of smiles [FragFp] bit 109 | 0.072336 | 0.003478 | 0.005936  |
| Structure of smiles [FragFp] bit 11  | 0.078983 | -0.02374 | -8.67E-04 |
| Structure of smiles [FragFp] bit 110 | 0.061818 | -0.00293 | 0.008195  |
| Structure of smiles [FragFp] bit 111 | 0.079669 | -0.0145  | -0.0095   |
| Structure of smiles [FragFp] bit 112 | 0.036881 | -0.05491 | 0.022848  |

|                                      |          |          |           |
|--------------------------------------|----------|----------|-----------|
| Structure of smiles [FragFp] bit 113 | 0.069186 | 0.045472 | 0.009443  |
| Structure of smiles [FragFp] bit 114 | 0.064249 | -0.06462 | 0.003885  |
| Structure of smiles [FragFp] bit 115 | 0.069148 | -0.05192 | -0.01664  |
| Structure of smiles [FragFp] bit 116 | 0.010476 | 0.013516 | 0.028497  |
| Structure of smiles [FragFp] bit 117 | 0.080444 | -0.01705 | -5.15E-04 |
| Structure of smiles [FragFp] bit 118 | 0.072605 | -0.03934 | -0.00937  |
| Structure of smiles [FragFp] bit 119 | 0.068194 | 0.042348 | 0.02217   |
| Structure of smiles [FragFp] bit 12  | 0.078954 | -0.02935 | 0.010759  |
| Structure of smiles [FragFp] bit 120 | 0.072155 | -0.04395 | -0.01023  |
| Structure of smiles [FragFp] bit 121 | 0.05751  | 0.042772 | -0.02567  |
| Structure of smiles [FragFp] bit 122 | 0.046113 | -0.10379 | -0.0153   |
| Structure of smiles [FragFp] bit 123 | 0.043329 | -0.10273 | -0.00913  |
| Structure of smiles [FragFp] bit 124 | 0.007868 | -0.04271 | 0.034956  |
| Structure of smiles [FragFp] bit 125 | 0.058365 | -0.04128 | 0.033946  |
| Structure of smiles [FragFp] bit 126 | 0.050277 | -0.05379 | 0.046309  |
| Structure of smiles [FragFp] bit 127 | 0.074562 | 0.006511 | 0.005103  |
| Structure of smiles [FragFp] bit 128 | 0.06562  | -0.03831 | -0.01886  |
| Structure of smiles [FragFp] bit 129 | -0.01014 | 0.033772 | 0.090405  |
| Structure of smiles [FragFp] bit 13  | -0.00213 | 0.023151 | 0.068301  |
| Structure of smiles [FragFp] bit 130 | 0.073059 | 0.014696 | -0.0098   |
| Structure of smiles [FragFp] bit 131 | 0.057864 | -0.0226  | 0.035209  |
| Structure of smiles [FragFp] bit 132 | 0.061353 | 0.057819 | 0.012535  |
| Structure of smiles [FragFp] bit 133 | 0.012332 | 0.009707 | 0.005238  |
| Structure of smiles [FragFp] bit 134 | -0.00889 | 0.024692 | 0.064695  |
| Structure of smiles [FragFp] bit 135 | -0.00471 | -0.00378 | 0.017042  |
| Structure of smiles [FragFp] bit 136 | 0.034755 | -0.10213 | -0.01941  |
| Structure of smiles [FragFp] bit 137 | -0.0054  | 0.019425 | 0.104899  |
| Structure of smiles [FragFp] bit 138 | 0.076576 | 0.020559 | -1.86E-04 |
| Structure of smiles [FragFp] bit 139 | 0.030256 | 0.01667  | 0.036157  |
| Structure of smiles [FragFp] bit 14  | 0.066122 | -0.06332 | 0.002424  |
| Structure of smiles [FragFp] bit 140 | -0.01004 | -0.00415 | 0.132058  |
| Structure of smiles [FragFp] bit 141 | -0.00727 | 0.011029 | 0.101681  |
| Structure of smiles [FragFp] bit 142 | 0.06466  | 0.060542 | 0.00158   |
| Structure of smiles [FragFp] bit 143 | 0.03632  | 0.064576 | -0.00816  |
| Structure of smiles [FragFp] bit 144 | 0.06883  | 0.071363 | 0.010253  |
| Structure of smiles [FragFp] bit 145 | 0.068454 | -0.0334  | 0.024787  |
| Structure of smiles [FragFp] bit 146 | -0.01428 | -0.01572 | 0.119135  |
| Structure of smiles [FragFp] bit 147 | 0.056954 | 0.083205 | 0.014125  |
| Structure of smiles [FragFp] bit 148 | 0.059091 | -0.02984 | 0.039114  |
| Structure of smiles [FragFp] bit 149 | 0.010844 | -0.09532 | 0.05123   |
| Structure of smiles [FragFp] bit 15  | 0.059073 | -0.07767 | 9.60E-04  |
| Structure of smiles [FragFp] bit 150 | 0.032696 | 0.053519 | -0.01741  |
| Structure of smiles [FragFp] bit 151 | 0.065504 | 0.024519 | 0.005364  |
| Structure of smiles [FragFp] bit 152 | 0.059393 | -0.00262 | -0.01503  |
| Structure of smiles [FragFp] bit 153 | 0.072332 | 0.015326 | 0.010148  |
| Structure of smiles [FragFp] bit 154 | 0.059959 | -0.03097 | -0.01842  |

|                                      |          |           |           |
|--------------------------------------|----------|-----------|-----------|
| Structure of smiles [FragFp] bit 155 | 0.073918 | 0.044684  | 0.015035  |
| Structure of smiles [FragFp] bit 156 | 0.044785 | -0.00528  | -3.05E-05 |
| Structure of smiles [FragFp] bit 157 | 0.049053 | 0.063571  | 0.003024  |
| Structure of smiles [FragFp] bit 158 | 0.071026 | 0.054091  | 0.012251  |
| Structure of smiles [FragFp] bit 159 | 0.069649 | -0.03437  | 0.019209  |
| Structure of smiles [FragFp] bit 16  | -0.02312 | -0.00233  | 0.117006  |
| Structure of smiles [FragFp] bit 160 | 0.072955 | 0.039602  | 0.002204  |
| Structure of smiles [FragFp] bit 161 | 0.048555 | -2.74E-04 | -0.03047  |
| Structure of smiles [FragFp] bit 162 | -0.00496 | -0.11012  | -0.0081   |
| Structure of smiles [FragFp] bit 163 | 0.076743 | 0.031581  | -0.00538  |
| Structure of smiles [FragFp] bit 164 | 0.05587  | -0.08333  | -0.0468   |
| Structure of smiles [FragFp] bit 165 | 0.067609 | -0.03849  | -0.02847  |
| Structure of smiles [FragFp] bit 166 | 0.010096 | -0.02594  | 0.058558  |
| Structure of smiles [FragFp] bit 167 | 0.066306 | -0.06407  | -0.00612  |
| Structure of smiles [FragFp] bit 168 | 0.046758 | 0.049865  | -0.00285  |
| Structure of smiles [FragFp] bit 169 | 0.027004 | 0.053539  | 0.026677  |
| Structure of smiles [FragFp] bit 17  | 0.071214 | 0.002764  | 0.005214  |
| Structure of smiles [FragFp] bit 170 | 0.052739 | 0.01778   | -0.03227  |
| Structure of smiles [FragFp] bit 171 | 0.073047 | -0.02219  | 0.01961   |
| Structure of smiles [FragFp] bit 172 | 0.073458 | -0.04241  | 0.024969  |
| Structure of smiles [FragFp] bit 173 | 0.071943 | 0.028024  | 0.004266  |
| Structure of smiles [FragFp] bit 174 | 0.050122 | 0.041994  | -0.03465  |
| Structure of smiles [FragFp] bit 175 | 0.05809  | -0.04201  | 0.014504  |
| Structure of smiles [FragFp] bit 176 | 0.067108 | -0.06921  | -0.03524  |
| Structure of smiles [FragFp] bit 177 | -0.012   | 0.029688  | 0.117351  |
| Structure of smiles [FragFp] bit 178 | 0.072077 | 0.040563  | -0.00219  |
| Structure of smiles [FragFp] bit 179 | 0.048829 | -0.10514  | -0.01352  |
| Structure of smiles [FragFp] bit 18  | 0.040686 | -0.09818  | -0.00811  |
| Structure of smiles [FragFp] bit 180 | -0.01688 | 0.031872  | 0.119413  |
| Structure of smiles [FragFp] bit 181 | -0.00604 | -0.05901  | 0.014899  |
| Structure of smiles [FragFp] bit 182 | 0.069683 | 0.051865  | 0.010552  |
| Structure of smiles [FragFp] bit 183 | 0.019001 | -0.05516  | 0.038105  |
| Structure of smiles [FragFp] bit 184 | 0.041747 | 0.041049  | -0.03029  |
| Structure of smiles [FragFp] bit 185 | 0.059238 | -0.04851  | 0.038348  |
| Structure of smiles [FragFp] bit 186 | 0.068837 | 0.002123  | 0.008489  |
| Structure of smiles [FragFp] bit 187 | 0.069143 | 0.036992  | 0.012245  |
| Structure of smiles [FragFp] bit 188 | 0.065394 | 0.008665  | 0.019113  |
| Structure of smiles [FragFp] bit 189 | 0.075045 | 0.035047  | -0.00267  |
| Structure of smiles [FragFp] bit 19  | 0.065737 | -0.061    | 0.002616  |
| Structure of smiles [FragFp] bit 190 | 0.035317 | 0.067713  | 0.037542  |
| Structure of smiles [FragFp] bit 191 | -0.01022 | -0.02505  | 0.052538  |
| Structure of smiles [FragFp] bit 192 | 0.042016 | -0.08942  | -0.03538  |
| Structure of smiles [FragFp] bit 193 | 0.060154 | 0.045447  | 2.95E-04  |
| Structure of smiles [FragFp] bit 194 | 0.016209 | -0.00578  | 9.00E-04  |
| Structure of smiles [FragFp] bit 195 | 0.008965 | -0.06979  | 0.007854  |
| Structure of smiles [FragFp] bit 196 | 0.007081 | 0.005106  | 0.098515  |

|                                      |          |          |           |
|--------------------------------------|----------|----------|-----------|
| Structure of smiles [FragFp] bit 197 | 0.057254 | -0.04223 | 0.033802  |
| Structure of smiles [FragFp] bit 198 | 0.063569 | 0.06653  | 0.01349   |
| Structure of smiles [FragFp] bit 199 | 0.011911 | -0.08069 | 0.030842  |
| Structure of smiles [FragFp] bit 2   | 0.073896 | -0.03366 | -0.01977  |
| Structure of smiles [FragFp] bit 20  | 8.32E-04 | -0.00555 | 0.095339  |
| Structure of smiles [FragFp] bit 200 | 0.002732 | 0.01883  | 0.06655   |
| Structure of smiles [FragFp] bit 201 | 0.027639 | 0.045034 | -0.00167  |
| Structure of smiles [FragFp] bit 202 | -0.00719 | 0.032311 | 0.102397  |
| Structure of smiles [FragFp] bit 203 | -0.01648 | 0.019661 | 0.112224  |
| Structure of smiles [FragFp] bit 204 | 0.03611  | 0.054836 | -0.01976  |
| Structure of smiles [FragFp] bit 205 | 0.076176 | -0.01088 | -5.34E-04 |
| Structure of smiles [FragFp] bit 206 | 0.060502 | -0.03362 | -0.01405  |
| Structure of smiles [FragFp] bit 207 | 0.034481 | 0.033963 | -0.03134  |
| Structure of smiles [FragFp] bit 208 | 0.06848  | -0.02963 | 0.011527  |
| Structure of smiles [FragFp] bit 209 | 0.067281 | 0.058088 | 0.01276   |
| Structure of smiles [FragFp] bit 21  | 0.065085 | 0.026137 | 0.022803  |
| Structure of smiles [FragFp] bit 210 | 0.058693 | -0.06243 | -0.00927  |
| Structure of smiles [FragFp] bit 211 | 4.59E-04 | -0.052   | 0.002427  |
| Structure of smiles [FragFp] bit 212 | 0.029678 | 0.051232 | 0.026692  |
| Structure of smiles [FragFp] bit 213 | 0.062932 | 0.033529 | 0.023548  |
| Structure of smiles [FragFp] bit 214 | 0.058954 | 0.056785 | 0.012444  |
| Structure of smiles [FragFp] bit 215 | 0.017474 | -0.02862 | 0.069538  |
| Structure of smiles [FragFp] bit 216 | 0.015626 | 0.022433 | -0.01648  |
| Structure of smiles [FragFp] bit 217 | 0.005775 | 0.002976 | -0.00873  |
| Structure of smiles [FragFp] bit 218 | 0.073742 | 0.035618 | 3.53E-04  |
| Structure of smiles [FragFp] bit 219 | -0.01372 | -0.02951 | 0.104677  |
| Structure of smiles [FragFp] bit 22  | 0.035778 | -0.05787 | 0.037254  |
| Structure of smiles [FragFp] bit 220 | 0.062092 | -0.03279 | -5.01E-04 |
| Structure of smiles [FragFp] bit 221 | 0.061502 | -0.07288 | -0.03516  |
| Structure of smiles [FragFp] bit 222 | 0.067884 | 0.01549  | 0.011716  |
| Structure of smiles [FragFp] bit 223 | -0.00524 | -0.05692 | 2.14E-04  |
| Structure of smiles [FragFp] bit 224 | 0.030902 | 0.03515  | -0.03613  |
| Structure of smiles [FragFp] bit 225 | 0.067879 | 0.059344 | 0.002184  |
| Structure of smiles [FragFp] bit 226 | -0.01823 | -0.07378 | 0.073772  |
| Structure of smiles [FragFp] bit 227 | 0.065442 | -0.02465 | 0.027087  |
| Structure of smiles [FragFp] bit 228 | -0.0146  | -0.02864 | 0.093439  |
| Structure of smiles [FragFp] bit 229 | 0.063933 | -0.06207 | -0.02413  |
| Structure of smiles [FragFp] bit 23  | 0.071359 | -0.04852 | -0.01005  |
| Structure of smiles [FragFp] bit 230 | 0.031476 | 0.053854 | -0.01825  |
| Structure of smiles [FragFp] bit 231 | 0.035379 | 0.072847 | 0.042145  |
| Structure of smiles [FragFp] bit 232 | 0.027122 | 0.043809 | -0.02179  |
| Structure of smiles [FragFp] bit 233 | 0.061063 | -0.02057 | 0.011373  |
| Structure of smiles [FragFp] bit 234 | 0.025966 | 0.029127 | -0.00255  |
| Structure of smiles [FragFp] bit 235 | 0.06513  | 0.046612 | -0.02599  |
| Structure of smiles [FragFp] bit 236 | 0.025541 | 0.037624 | -0.02262  |
| Structure of smiles [FragFp] bit 237 | -0.01753 | 0.001295 | 0.138356  |

|                                      |          |          |           |
|--------------------------------------|----------|----------|-----------|
| Structure of smiles [FragFp] bit 238 | 0.042724 | -0.06481 | 0.017643  |
| Structure of smiles [FragFp] bit 239 | -0.00942 | 0.029423 | 0.1263    |
| Structure of smiles [FragFp] bit 24  | 0.071265 | -0.04908 | -0.01268  |
| Structure of smiles [FragFp] bit 240 | 0.062804 | 0.003845 | 0.031129  |
| Structure of smiles [FragFp] bit 241 | 0.05356  | -0.03712 | 0.034959  |
| Structure of smiles [FragFp] bit 242 | -0.01406 | -0.04869 | 0.044937  |
| Structure of smiles [FragFp] bit 243 | 0.037639 | -0.05354 | 0.022083  |
| Structure of smiles [FragFp] bit 244 | 0.065844 | 0.017896 | 0.00733   |
| Structure of smiles [FragFp] bit 245 | -0.01485 | -0.0855  | 0.043787  |
| Structure of smiles [FragFp] bit 246 | 0.014574 | -0.00406 | 0.038152  |
| Structure of smiles [FragFp] bit 247 | 0.035501 | 0.006244 | -0.01043  |
| Structure of smiles [FragFp] bit 248 | -0.00763 | -0.04423 | 0.060263  |
| Structure of smiles [FragFp] bit 249 | 0.069625 | 0.028373 | 9.96E-04  |
| Structure of smiles [FragFp] bit 25  | 0.009157 | -0.05014 | 0.037698  |
| Structure of smiles [FragFp] bit 250 | 0.073478 | 0.043811 | -4.42E-04 |
| Structure of smiles [FragFp] bit 251 | 0.064084 | -0.05447 | -0.03776  |
| Structure of smiles [FragFp] bit 252 | 0.036221 | -0.06294 | 0.004027  |
| Structure of smiles [FragFp] bit 253 | 0.067371 | 0.009239 | 0.010244  |
| Structure of smiles [FragFp] bit 254 | 0.066809 | 0.046202 | -0.02366  |
| Structure of smiles [FragFp] bit 255 | 0.068476 | 0.045784 | 0.012031  |
| Structure of smiles [FragFp] bit 256 | 0.035517 | 0.049937 | -0.01776  |
| Structure of smiles [FragFp] bit 257 | 0.025493 | -0.054   | 9.05E-04  |
| Structure of smiles [FragFp] bit 258 | -0.00822 | -0.02468 | 0.052121  |
| Structure of smiles [FragFp] bit 259 | 0.062693 | -0.01751 | -0.00358  |
| Structure of smiles [FragFp] bit 26  | 0.038904 | -0.07247 | 0.020285  |
| Structure of smiles [FragFp] bit 260 | -0.00765 | 0.020286 | 0.07309   |
| Structure of smiles [FragFp] bit 261 | -0.00168 | -0.11276 | -0.01111  |
| Structure of smiles [FragFp] bit 262 | 0.064505 | -0.0516  | -0.02431  |
| Structure of smiles [FragFp] bit 263 | 0.039406 | -0.09514 | -0.01458  |
| Structure of smiles [FragFp] bit 264 | 0.064806 | 0.027111 | 0.016707  |
| Structure of smiles [FragFp] bit 265 | 0.024108 | 0.032562 | -0.00918  |
| Structure of smiles [FragFp] bit 266 | 0.04419  | 0.021081 | -0.0209   |
| Structure of smiles [FragFp] bit 267 | 0.056843 | -0.00745 | -0.01901  |
| Structure of smiles [FragFp] bit 268 | 0.006451 | 0.028412 | 0.00737   |
| Structure of smiles [FragFp] bit 269 | -0.01622 | 0.023979 | 0.110472  |
| Structure of smiles [FragFp] bit 27  | 0.059597 | 0.03163  | -0.00823  |
| Structure of smiles [FragFp] bit 270 | -0.00806 | 0.004178 | 0.119447  |
| Structure of smiles [FragFp] bit 271 | 0.058762 | 0.028934 | 0.023582  |
| Structure of smiles [FragFp] bit 272 | 0.020849 | -0.00837 | 0.03503   |
| Structure of smiles [FragFp] bit 273 | -0.00147 | -0.07325 | -0.01769  |
| Structure of smiles [FragFp] bit 274 | 0.048209 | -0.05975 | 0.048029  |
| Structure of smiles [FragFp] bit 275 | 0.036754 | -0.07027 | -0.0288   |
| Structure of smiles [FragFp] bit 276 | 0.03497  | -0.00226 | 0.061439  |
| Structure of smiles [FragFp] bit 277 | -0.01185 | -0.06379 | 0.072416  |
| Structure of smiles [FragFp] bit 278 | 0.066996 | -0.01982 | -0.02244  |
| Structure of smiles [FragFp] bit 279 | 0.025373 | 0.025031 | 0.011109  |

|                                      |          |          |          |
|--------------------------------------|----------|----------|----------|
| Structure of smiles [FragFp] bit 28  | 0.033371 | -0.05569 | 0.027876 |
| Structure of smiles [FragFp] bit 280 | 0.057399 | 0.040317 | 0.025778 |
| Structure of smiles [FragFp] bit 281 | 0.007551 | -0.12029 | -0.01181 |
| Structure of smiles [FragFp] bit 282 | 0.034167 | 0.062612 | 0.042472 |
| Structure of smiles [FragFp] bit 283 | 0.061023 | -0.03066 | -0.01857 |
| Structure of smiles [FragFp] bit 284 | 0.060232 | 0.023788 | 0.025577 |
| Structure of smiles [FragFp] bit 285 | 0.025968 | 0.035573 | -0.01409 |
| Structure of smiles [FragFp] bit 286 | 0.059143 | -0.04335 | -0.05096 |
| Structure of smiles [FragFp] bit 287 | 0.068775 | 0.044519 | 4.01E-04 |
| Structure of smiles [FragFp] bit 288 | 0.060717 | 0.019331 | -0.02502 |
| Structure of smiles [FragFp] bit 289 | 0.063751 | -0.01408 | 0.03087  |
| Structure of smiles [FragFp] bit 29  | 0.057152 | 0.028501 | -0.00162 |
| Structure of smiles [FragFp] bit 290 | 0.049007 | 0.077229 | 0.01064  |
| Structure of smiles [FragFp] bit 291 | 0.066876 | 0.050969 | 0.017264 |
| Structure of smiles [FragFp] bit 292 | 0.053231 | 0.075176 | 0.020438 |
| Structure of smiles [FragFp] bit 293 | -0.00994 | -0.07863 | 0.043019 |
| Structure of smiles [FragFp] bit 294 | -0.00991 | 0.026257 | 0.114869 |
| Structure of smiles [FragFp] bit 295 | 0.072654 | 0.001403 | 0.007261 |
| Structure of smiles [FragFp] bit 296 | 0.064889 | 0.031499 | -0.01606 |
| Structure of smiles [FragFp] bit 297 | 0.061064 | 0.06738  | 0.015802 |
| Structure of smiles [FragFp] bit 298 | 0.04213  | 0.010055 | -0.00565 |
| Structure of smiles [FragFp] bit 299 | -0.01496 | 0.028615 | 0.073678 |
| Structure of smiles [FragFp] bit 3   | 0.081358 | -0.01382 | 0.001266 |
| Structure of smiles [FragFp] bit 30  | 0.018224 | 0.032445 | 0.017406 |
| Structure of smiles [FragFp] bit 300 | 0.002691 | -0.04093 | 0.006703 |
| Structure of smiles [FragFp] bit 301 | 0.032744 | 0.023348 | 0.032239 |
| Structure of smiles [FragFp] bit 302 | 0.04762  | 0.033702 | -0.04407 |
| Structure of smiles [FragFp] bit 303 | 0.001569 | 0.011382 | 0.036667 |
| Structure of smiles [FragFp] bit 304 | 0.031208 | 0.023589 | 0.06984  |
| Structure of smiles [FragFp] bit 305 | 0.041404 | -0.03731 | -0.00727 |
| Structure of smiles [FragFp] bit 306 | 0.055904 | 0.083877 | 0.016563 |
| Structure of smiles [FragFp] bit 307 | -0.01585 | 0.006328 | 0.10313  |
| Structure of smiles [FragFp] bit 308 | -0.01297 | -0.08574 | 0.039564 |
| Structure of smiles [FragFp] bit 309 | 0.067855 | 0.067724 | 0.012523 |
| Structure of smiles [FragFp] bit 31  | 0.074327 | -0.03913 | 0.016433 |
| Structure of smiles [FragFp] bit 310 | 0.02432  | 0.056573 | -0.00207 |
| Structure of smiles [FragFp] bit 311 | 0.061774 | -0.06564 | -0.03699 |
| Structure of smiles [FragFp] bit 312 | -0.00781 | 0.014743 | 0.118217 |
| Structure of smiles [FragFp] bit 313 | 0.060495 | -0.0067  | 0.015594 |
| Structure of smiles [FragFp] bit 314 | 0.060755 | 0.003265 | -0.02143 |
| Structure of smiles [FragFp] bit 315 | -0.00552 | -0.06608 | 0.048672 |
| Structure of smiles [FragFp] bit 316 | 0.048915 | 0.035725 | 0.026165 |
| Structure of smiles [FragFp] bit 317 | 0.073451 | 0.016081 | 0.003509 |
| Structure of smiles [FragFp] bit 318 | 0.065039 | 0.031444 | 0.009404 |
| Structure of smiles [FragFp] bit 319 | 0.059151 | -0.0598  | -0.02978 |
| Structure of smiles [FragFp] bit 32  | 0.060499 | 0.025861 | 0.023262 |



|                                      |          |          |          |
|--------------------------------------|----------|----------|----------|
| Structure of smiles [FragFp] bit 320 | 0.027193 | -0.01969 | 0.045769 |
| Structure of smiles [FragFp] bit 321 | 0.062454 | -0.02953 | 0.020486 |
| Structure of smiles [FragFp] bit 322 | 0.063605 | 0.024255 | 0.006598 |
| Structure of smiles [FragFp] bit 323 | 0.060985 | -0.01173 | -0.02794 |
| Structure of smiles [FragFp] bit 324 | -0.00752 | 0.022813 | 0.094452 |
| Structure of smiles [FragFp] bit 325 | 0.061404 | 0.012674 | -0.02684 |
| Structure of smiles [FragFp] bit 326 | -0.01364 | -0.02901 | 0.088997 |
| Structure of smiles [FragFp] bit 327 | 0.026048 | 0.016554 | -0.01209 |
| Structure of smiles [FragFp] bit 328 | 0.057941 | 0.064173 | 0.014896 |
| Structure of smiles [FragFp] bit 329 | 0.062053 | -0.0015  | -0.03485 |
| Structure of smiles [FragFp] bit 33  | 0.044265 | -0.08495 | 0.011937 |
| Structure of smiles [FragFp] bit 330 | -0.00113 | -0.04458 | 0.040036 |
| Structure of smiles [FragFp] bit 331 | -0.01749 | -0.02766 | 0.104299 |
| Structure of smiles [FragFp] bit 332 | 0.019516 | -0.1197  | 0.01821  |
| Structure of smiles [FragFp] bit 333 | -0.00902 | 0.018965 | 0.090081 |
| Structure of smiles [FragFp] bit 334 | -0.00984 | -0.03744 | 0.097286 |
| Structure of smiles [FragFp] bit 335 | -0.01101 | 0.028785 | 0.119455 |
| Structure of smiles [FragFp] bit 336 | 0.010302 | -0.04052 | 0.03458  |
| Structure of smiles [FragFp] bit 337 | 0.007972 | 0.031424 | -0.00132 |
| Structure of smiles [FragFp] bit 338 | -0.01994 | -0.08868 | 0.03996  |
| Structure of smiles [FragFp] bit 339 | 0.057908 | 0.028973 | 0.022253 |
| Structure of smiles [FragFp] bit 34  | 0.054936 | -0.07769 | 0.017379 |
| Structure of smiles [FragFp] bit 340 | 0.037003 | -0.05942 | -0.02949 |
| Structure of smiles [FragFp] bit 341 | -0.01355 | 0.026119 | 0.068336 |
| Structure of smiles [FragFp] bit 342 | 0.065232 | 0.037823 | 0.023153 |
| Structure of smiles [FragFp] bit 343 | 0.048477 | -0.03408 | -0.01053 |
| Structure of smiles [FragFp] bit 344 | 0.019433 | -0.03463 | 0.062916 |
| Structure of smiles [FragFp] bit 345 | 0.058804 | 0.004058 | 0.025914 |
| Structure of smiles [FragFp] bit 346 | 0.015588 | 0.020793 | -0.01367 |
| Structure of smiles [FragFp] bit 347 | -0.00817 | -0.04989 | 0.030681 |
| Structure of smiles [FragFp] bit 348 | 0.036149 | 0.020913 | 0.034171 |
| Structure of smiles [FragFp] bit 349 | 0.046721 | -0.05124 | 0.002014 |
| Structure of smiles [FragFp] bit 35  | 0.023511 | -0.05733 | 0.03049  |
| Structure of smiles [FragFp] bit 350 | -0.00847 | 0.020936 | 0.011056 |
| Structure of smiles [FragFp] bit 351 | 0.028513 | 0.036505 | -0.02715 |
| Structure of smiles [FragFp] bit 352 | 0.067011 | 0.032636 | 0.003616 |
| Structure of smiles [FragFp] bit 353 | 0.00536  | 0.020094 | 0.022757 |
| Structure of smiles [FragFp] bit 354 | 0.026875 | -0.0078  | 0.002197 |
| Structure of smiles [FragFp] bit 355 | -0.0098  | -0.00645 | 0.127583 |
| Structure of smiles [FragFp] bit 356 | 0.036664 | 0.018934 | -0.0279  |
| Structure of smiles [FragFp] bit 357 | 0.057711 | 0.042162 | 0.018292 |
| Structure of smiles [FragFp] bit 358 | 0.055106 | 0.019424 | 0.029097 |
| Structure of smiles [FragFp] bit 359 | 0.059903 | -0.02363 | 0.008778 |
| Structure of smiles [FragFp] bit 36  | 0.027171 | -0.03819 | 0.014875 |
| Structure of smiles [FragFp] bit 360 | -0.01253 | -0.04632 | -0.01041 |
| Structure of smiles [FragFp] bit 361 | 0.04993  | -0.00252 | -0.01976 |

|                                      |          |          |          |
|--------------------------------------|----------|----------|----------|
| Structure of smiles [FragFp] bit 362 | -0.00907 | 0.027982 | 0.129908 |
| Structure of smiles [FragFp] bit 363 | 0.060297 | 0.055189 | -0.02492 |
| Structure of smiles [FragFp] bit 364 | 0.054643 | 0.012713 | -0.00637 |
| Structure of smiles [FragFp] bit 365 | 0.012073 | -0.04026 | 0.100632 |
| Structure of smiles [FragFp] bit 366 | -0.00168 | -0.04195 | -0.00281 |
| Structure of smiles [FragFp] bit 367 | 0.002444 | 0.008184 | 0.057447 |
| Structure of smiles [FragFp] bit 368 | 0.053241 | -0.0122  | -0.01629 |
| Structure of smiles [FragFp] bit 369 | -0.00816 | 0.035028 | 0.099795 |
| Structure of smiles [FragFp] bit 37  | 0.070651 | -0.0297  | 0.022854 |
| Structure of smiles [FragFp] bit 370 | -0.01633 | -0.09163 | 0.050686 |
| Structure of smiles [FragFp] bit 371 | 0.049488 | 0.015561 | 0.055457 |
| Structure of smiles [FragFp] bit 372 | -0.00404 | -0.04522 | 0.043271 |
| Structure of smiles [FragFp] bit 373 | 0.06499  | 0.020345 | 0.007039 |
| Structure of smiles [FragFp] bit 374 | -0.01862 | 0.014692 | 0.095965 |
| Structure of smiles [FragFp] bit 375 | 0.055045 | 0.029979 | 0.04577  |
| Structure of smiles [FragFp] bit 376 | -0.01155 | 0.023719 | 0.073772 |
| Structure of smiles [FragFp] bit 377 | 0.059822 | 0.056135 | 0.002688 |
| Structure of smiles [FragFp] bit 378 | -0.00982 | 0.027506 | 0.091254 |
| Structure of smiles [FragFp] bit 379 | 0.02885  | 0.032346 | 0.03893  |
| Structure of smiles [FragFp] bit 38  | 0.051979 | -0.06664 | 0.007627 |
| Structure of smiles [FragFp] bit 380 | 0.061384 | 0.064793 | 0.009396 |
| Structure of smiles [FragFp] bit 381 | -0.01739 | 0.029292 | 0.065917 |
| Structure of smiles [FragFp] bit 382 | 0.043731 | 0.044198 | 0.06026  |
| Structure of smiles [FragFp] bit 383 | 0.062137 | 0.047462 | 0.025058 |
| Structure of smiles [FragFp] bit 384 | 0.024377 | 0.015817 | 0.006787 |
| Structure of smiles [FragFp] bit 385 | -0.00184 | 0.031698 | 0.11119  |
| Structure of smiles [FragFp] bit 386 | 0.051789 | 0.016427 | -0.01827 |
| Structure of smiles [FragFp] bit 387 | 0.019838 | -0.00106 | 0.038964 |
| Structure of smiles [FragFp] bit 388 | 0.05527  | -0.04775 | 0.025733 |
| Structure of smiles [FragFp] bit 389 | 0.027525 | 0.026177 | 0.004285 |
| Structure of smiles [FragFp] bit 39  | 0.063875 | -0.06323 | 2.17E-04 |
| Structure of smiles [FragFp] bit 390 | 0.040573 | 0.040245 | -0.01991 |
| Structure of smiles [FragFp] bit 391 | 0.05325  | 0.040382 | -0.03257 |
| Structure of smiles [FragFp] bit 392 | 0.058606 | 0.059323 | 0.006946 |
| Structure of smiles [FragFp] bit 393 | -0.00998 | 0.024547 | 0.045091 |
| Structure of smiles [FragFp] bit 394 | 0.013237 | -0.02008 | 0.030054 |
| Structure of smiles [FragFp] bit 395 | 0.051547 | 0.026034 | -0.02101 |
| Structure of smiles [FragFp] bit 396 | -0.01091 | 0.008215 | 7.69E-04 |
| Structure of smiles [FragFp] bit 397 | -0.0112  | 0.00629  | 0.05414  |
| Structure of smiles [FragFp] bit 398 | 0.02477  | 0.031091 | -0.01188 |
| Structure of smiles [FragFp] bit 399 | 0.009256 | 0.009213 | 0.035271 |
| Structure of smiles [FragFp] bit 4   | 0.073749 | -0.03514 | -0.01934 |
| Structure of smiles [FragFp] bit 40  | 0.018757 | -0.05044 | 0.031005 |
| Structure of smiles [FragFp] bit 400 | 0.046839 | -0.0527  | -0.01202 |
| Structure of smiles [FragFp] bit 401 | 4.90E-04 | 0.029595 | 0.093527 |
| Structure of smiles [FragFp] bit 402 | -0.01355 | -0.06553 | 0.071296 |

|                                      |          |          |           |
|--------------------------------------|----------|----------|-----------|
| Structure of smiles [FragFp] bit 403 | 0.041105 | 0.022518 | -0.03102  |
| Structure of smiles [FragFp] bit 404 | 0.013663 | -0.05664 | 0.035686  |
| Structure of smiles [FragFp] bit 405 | 0.024601 | 0.033397 | -0.01769  |
| Structure of smiles [FragFp] bit 406 | 0.026402 | 0.025175 | -0.00239  |
| Structure of smiles [FragFp] bit 407 | 0.018122 | -0.01475 | 0.021809  |
| Structure of smiles [FragFp] bit 408 | 0.055914 | -0.01683 | -0.02076  |
| Structure of smiles [FragFp] bit 409 | -0.00934 | 0.015707 | 0.037096  |
| Structure of smiles [FragFp] bit 41  | 0.052778 | 0.022857 | -7.31E-04 |
| Structure of smiles [FragFp] bit 410 | 0.059805 | -0.03404 | -0.01445  |
| Structure of smiles [FragFp] bit 411 | -0.01105 | 0.007441 | 0.098115  |
| Structure of smiles [FragFp] bit 412 | 0.020027 | 0.018151 | 0.002262  |
| Structure of smiles [FragFp] bit 413 | 0.024197 | 0.024865 | -0.01384  |
| Structure of smiles [FragFp] bit 414 | -0.01451 | 0.03367  | 0.09667   |
| Structure of smiles [FragFp] bit 415 | 0.02975  | -0.06897 | -0.00153  |
| Structure of smiles [FragFp] bit 416 | 0.015622 | 0.025691 | -0.0199   |
| Structure of smiles [FragFp] bit 417 | -0.00901 | 0.002219 | 0.092843  |
| Structure of smiles [FragFp] bit 418 | 0.012468 | -0.08582 | -0.01739  |
| Structure of smiles [FragFp] bit 419 | -0.00879 | 0.033735 | 0.095225  |
| Structure of smiles [FragFp] bit 42  | 0.018491 | 0.034162 | 0.025162  |
| Structure of smiles [FragFp] bit 420 | 0.040195 | -0.00142 | 0.038397  |
| Structure of smiles [FragFp] bit 421 | 0.007724 | 0.00946  | -0.02247  |
| Structure of smiles [FragFp] bit 422 | 0.055932 | 0.035491 | -0.02209  |
| Structure of smiles [FragFp] bit 423 | 0.015068 | -0.08719 | 0.022231  |
| Structure of smiles [FragFp] bit 424 | 0.016981 | -0.0281  | 0.047617  |
| Structure of smiles [FragFp] bit 425 | -0.0227  | -0.02873 | 0.037957  |
| Structure of smiles [FragFp] bit 426 | 0.034637 | 0.041433 | -0.01161  |
| Structure of smiles [FragFp] bit 427 | 7.04E-04 | -0.02728 | 0.071382  |
| Structure of smiles [FragFp] bit 428 | 0.062097 | 0.062847 | 0.01812   |
| Structure of smiles [FragFp] bit 429 | 0.043992 | -0.02803 | -0.01934  |
| Structure of smiles [FragFp] bit 43  | 0.068675 | -0.03829 | 0.024482  |
| Structure of smiles [FragFp] bit 430 | 0.006746 | -0.05866 | 0.079847  |
| Structure of smiles [FragFp] bit 431 | 0.051502 | 0.012681 | 0.017437  |
| Structure of smiles [FragFp] bit 432 | 0.00945  | -0.00877 | 0.035573  |
| Structure of smiles [FragFp] bit 433 | 0.048089 | 0.031592 | -0.04471  |
| Structure of smiles [FragFp] bit 434 | -0.01381 | 0.029159 | 0.004126  |
| Structure of smiles [FragFp] bit 435 | 0.027523 | 0.033381 | -0.02306  |
| Structure of smiles [FragFp] bit 436 | -0.01292 | -0.08496 | 0.041026  |
| Structure of smiles [FragFp] bit 437 | -0.00501 | -0.00845 | 0.020954  |
| Structure of smiles [FragFp] bit 438 | 0.066553 | 0.039288 | 0.005533  |
| Structure of smiles [FragFp] bit 439 | -0.00974 | 0.012292 | 0.106333  |
| Structure of smiles [FragFp] bit 44  | -0.01155 | 0.007452 | 0.086252  |
| Structure of smiles [FragFp] bit 440 | 0.027599 | 0.025353 | -0.01652  |
| Structure of smiles [FragFp] bit 441 | 0.040224 | -0.03925 | -0.00204  |
| Structure of smiles [FragFp] bit 442 | 0.045163 | -0.04437 | 0.044507  |
| Structure of smiles [FragFp] bit 443 | 0.029838 | 0.037171 | -0.02223  |
| Structure of smiles [FragFp] bit 444 | 0.007431 | 0.006399 | -0.0104   |

|                                      |          |          |           |
|--------------------------------------|----------|----------|-----------|
| Structure of smiles [FragFp] bit 445 | -0.01117 | 0.034702 | 0.062486  |
| Structure of smiles [FragFp] bit 446 | 0.033261 | 0.01654  | 0.048789  |
| Structure of smiles [FragFp] bit 447 | -0.00943 | -0.03404 | 0.046166  |
| Structure of smiles [FragFp] bit 448 | -0.01549 | 0.023048 | 0.001247  |
| Structure of smiles [FragFp] bit 449 | -0.00591 | -0.09142 | 0.004244  |
| Structure of smiles [FragFp] bit 45  | 0.024576 | -0.06663 | 0.022571  |
| Structure of smiles [FragFp] bit 450 | 0.023191 | 0.07186  | 0.025846  |
| Structure of smiles [FragFp] bit 451 | 0.009699 | 0.032028 | -0.00412  |
| Structure of smiles [FragFp] bit 452 | 0.00628  | 0.006637 | -0.01655  |
| Structure of smiles [FragFp] bit 453 | 0.005802 | 0.017622 | 0.003705  |
| Structure of smiles [FragFp] bit 454 | 0.007806 | -0.01999 | 0.007279  |
| Structure of smiles [FragFp] bit 455 | 0.009166 | 0.022975 | -0.01116  |
| Structure of smiles [FragFp] bit 456 | 0.002817 | 0.003383 | -6.78E-04 |
| Structure of smiles [FragFp] bit 457 | 0.010497 | 0.019916 | -0.01005  |
| Structure of smiles [FragFp] bit 458 | -0.00858 | 0.006692 | -0.00562  |
| Structure of smiles [FragFp] bit 459 | 0.010462 | 0.004076 | 0.031639  |
| Structure of smiles [FragFp] bit 46  | 0.043885 | -0.07669 | 0.022809  |
| Structure of smiles [FragFp] bit 460 | 0.012262 | 0.013588 | -0.00791  |
| Structure of smiles [FragFp] bit 461 | 6.94E-04 | 0.004813 | -0.00317  |
| Structure of smiles [FragFp] bit 462 | -0.00356 | -0.02892 | 0.014652  |
| Structure of smiles [FragFp] bit 463 | 0.014178 | 0.068851 | 0.029946  |
| Structure of smiles [FragFp] bit 464 | 0.009471 | 0.032077 | -0.00387  |
| Structure of smiles [FragFp] bit 465 | 0.00628  | 0.006637 | -0.01655  |
| Structure of smiles [FragFp] bit 466 | 0.005922 | 0.017613 | 0.003679  |
| Structure of smiles [FragFp] bit 467 | 0.007769 | -0.02005 | 0.007276  |
| Structure of smiles [FragFp] bit 468 | 0.009165 | 0.022962 | -0.01115  |
| Structure of smiles [FragFp] bit 469 | 0.015293 | 0.001536 | -0.01066  |
| Structure of smiles [FragFp] bit 47  | 0.011195 | -0.0418  | 0.015451  |
| Structure of smiles [FragFp] bit 470 | 0.026567 | 0.037793 | 0.084668  |
| Structure of smiles [FragFp] bit 471 | -0.00176 | 0.002069 | 0.026119  |
| Structure of smiles [FragFp] bit 472 | -0.00682 | 0.01788  | 0.04595   |
| Structure of smiles [FragFp] bit 473 | 0.020214 | -0.01816 | -0.00626  |
| Structure of smiles [FragFp] bit 474 | -0.01497 | -0.01399 | 0.082444  |
| Structure of smiles [FragFp] bit 475 | 0.035167 | 0.006114 | -0.02183  |
| Structure of smiles [FragFp] bit 476 | 0.00107  | 0.041122 | 0.077457  |
| Structure of smiles [FragFp] bit 477 | 0.032647 | -0.04519 | -0.02941  |
| Structure of smiles [FragFp] bit 478 | 0.022505 | 0.008509 | 0.08727   |
| Structure of smiles [FragFp] bit 479 | 0.024284 | -0.01806 | 0.003455  |
| Structure of smiles [FragFp] bit 48  | 0.051436 | -0.07545 | 0.015079  |
| Structure of smiles [FragFp] bit 480 | 0.008644 | -0.00804 | 0.072269  |
| Structure of smiles [FragFp] bit 481 | 0.002758 | -0.00417 | 0.055499  |
| Structure of smiles [FragFp] bit 482 | -0.00566 | 0.008853 | 0.092765  |
| Structure of smiles [FragFp] bit 483 | 0.052742 | -0.01847 | -0.03573  |
| Structure of smiles [FragFp] bit 484 | -0.00275 | 0.016212 | 0.064532  |
| Structure of smiles [FragFp] bit 485 | 0.053072 | 0.060412 | 0.010219  |
| Structure of smiles [FragFp] bit 486 | 0.028499 | 0.060576 | 0.046393  |

|                                      |           |          |           |
|--------------------------------------|-----------|----------|-----------|
| Structure of smiles [FragFp] bit 487 | 0.017898  | 0.027537 | -0.02626  |
| Structure of smiles [FragFp] bit 488 | -0.00152  | 0.01453  | 0.107368  |
| Structure of smiles [FragFp] bit 489 | 0.051725  | 0.013239 | 0.015521  |
| Structure of smiles [FragFp] bit 49  | 0.003418  | -0.03508 | 0.027671  |
| Structure of smiles [FragFp] bit 490 | 0.005768  | -0.05076 | 0.052717  |
| Structure of smiles [FragFp] bit 491 | 0.031842  | 0.051971 | 0.053516  |
| Structure of smiles [FragFp] bit 492 | -9.57E-04 | -0.05258 | 0.06209   |
| Structure of smiles [FragFp] bit 493 | -0.00232  | -0.04985 | -0.00564  |
| Structure of smiles [FragFp] bit 494 | -6.90E-04 | -0.00901 | 0.008318  |
| Structure of smiles [FragFp] bit 495 | 0.012112  | 0.028037 | -0.00125  |
| Structure of smiles [FragFp] bit 496 | 0.004763  | 0.011615 | 0.044009  |
| Structure of smiles [FragFp] bit 497 | 0.057486  | 0.026626 | -0.02928  |
| Structure of smiles [FragFp] bit 498 | 0.006525  | -0.00729 | 0.055417  |
| Structure of smiles [FragFp] bit 499 | 0.036043  | 0.053921 | 0.043562  |
| Structure of smiles [FragFp] bit 5   | 0.036787  | 0.069164 | 0.020779  |
| Structure of smiles [FragFp] bit 50  | 0.004542  | -0.02831 | 0.022595  |
| Structure of smiles [FragFp] bit 500 | -0.00689  | 0.029519 | 0.1002    |
| Structure of smiles [FragFp] bit 501 | 0.048315  | 0.031281 | -0.01515  |
| Structure of smiles [FragFp] bit 502 | -0.00328  | -0.08394 | 0.009633  |
| Structure of smiles [FragFp] bit 503 | 0.007838  | 0.007525 | -0.01316  |
| Structure of smiles [FragFp] bit 504 | 0.006561  | -0.02129 | 0.092534  |
| Structure of smiles [FragFp] bit 505 | 0.011343  | 0.006431 | 0.028347  |
| Structure of smiles [FragFp] bit 506 | -0.00131  | 0.023952 | 0.120385  |
| Structure of smiles [FragFp] bit 507 | 0.021679  | 0.0261   | 0.0033    |
| Structure of smiles [FragFp] bit 508 | 0.060595  | 0.047718 | 0.027521  |
| Structure of smiles [FragFp] bit 509 | 0.042535  | 0.018407 | -0.01839  |
| Structure of smiles [FragFp] bit 51  | 0.008517  | 0.036254 | 0.044287  |
| Structure of smiles [FragFp] bit 510 | 0.048774  | 0.065897 | 0.003754  |
| Structure of smiles [FragFp] bit 511 | -0.00563  | 0.037248 | 0.079579  |
| Structure of smiles [FragFp] bit 52  | 0.050368  | -0.07743 | 0.013561  |
| Structure of smiles [FragFp] bit 53  | 0.058694  | -0.03238 | 0.028826  |
| Structure of smiles [FragFp] bit 54  | 0.021405  | -0.05411 | 0.033899  |
| Structure of smiles [FragFp] bit 55  | 0.046054  | 0.006844 | -7.77E-04 |
| Structure of smiles [FragFp] bit 56  | 8.31E-04  | -0.02329 | 0.017547  |
| Structure of smiles [FragFp] bit 57  | 0.038667  | -0.06879 | 0.017229  |
| Structure of smiles [FragFp] bit 58  | 0.038364  | -0.06912 | 0.016628  |
| Structure of smiles [FragFp] bit 59  | 0.011298  | -0.03768 | 0.03041   |
| Structure of smiles [FragFp] bit 6   | 0.072069  | -0.01769 | 0.019399  |
| Structure of smiles [FragFp] bit 60  | 0.015784  | -0.01024 | 0.025334  |
| Structure of smiles [FragFp] bit 61  | 0.018983  | -0.0443  | 0.0254    |
| Structure of smiles [FragFp] bit 62  | 0.01096   | -0.01489 | 0.008928  |
| Structure of smiles [FragFp] bit 63  | 0.013457  | -0.03433 | 0.021387  |
| Structure of smiles [FragFp] bit 64  | -0.0195   | 0.003985 | 0.13575   |
| Structure of smiles [FragFp] bit 65  | 0.07362   | 0.011868 | -0.00705  |
| Structure of smiles [FragFp] bit 66  | 0.070601  | 0.016543 | 0.002905  |
| Structure of smiles [FragFp] bit 67  | 0.053315  | -0.08033 | 0.024577  |

|                                     |          |          |          |
|-------------------------------------|----------|----------|----------|
| Structure of smiles [FragFp] bit 68 | 0.071216 | 0.05137  | 0.003775 |
| Structure of smiles [FragFp] bit 69 | 0.078314 | 0.014096 | -0.01256 |
| Structure of smiles [FragFp] bit 7  | 0.064309 | 0.041418 | -0.00803 |
| Structure of smiles [FragFp] bit 70 | 0.074053 | 0.011525 | -0.00561 |
| Structure of smiles [FragFp] bit 71 | 0.015454 | 0.020771 | 0.023996 |
| Structure of smiles [FragFp] bit 72 | -0.02243 | 0.021101 | 0.084245 |
| Structure of smiles [FragFp] bit 73 | 0.074912 | 0.024141 | 0.00226  |
| Structure of smiles [FragFp] bit 74 | 0.014862 | 0.016055 | 0.022747 |
| Structure of smiles [FragFp] bit 75 | 0.05779  | 0.048086 | -0.03067 |
| Structure of smiles [FragFp] bit 76 | 0.059447 | -0.02305 | 0.021964 |
| Structure of smiles [FragFp] bit 77 | 0.031222 | -0.06415 | -0.00187 |
| Structure of smiles [FragFp] bit 78 | 0.069042 | 0.065366 | 0.011694 |
| Structure of smiles [FragFp] bit 79 | 0.027492 | 0.033964 | -0.01006 |
| Structure of smiles [FragFp] bit 8  | 0.037065 | -0.05974 | 0.03826  |
| Structure of smiles [FragFp] bit 80 | 0.078227 | 0.019773 | -0.0036  |
| Structure of smiles [FragFp] bit 81 | 0.061679 | -0.08758 | -0.02717 |
| Structure of smiles [FragFp] bit 82 | 0.051546 | 0.062695 | -0.00461 |
| Structure of smiles [FragFp] bit 83 | 0.036994 | 0.062891 | -0.00798 |
| Structure of smiles [FragFp] bit 84 | 0.071374 | -0.04927 | -0.00689 |
| Structure of smiles [FragFp] bit 85 | 0.077728 | -0.00577 | 0.003742 |
| Structure of smiles [FragFp] bit 86 | 0.057399 | -0.0876  | -0.02805 |
| Structure of smiles [FragFp] bit 87 | -0.01683 | -0.06502 | 0.070407 |
| Structure of smiles [FragFp] bit 88 | -0.00592 | 0.020237 | 0.073192 |
| Structure of smiles [FragFp] bit 89 | 0.07164  | 0.043027 | 0.022176 |
| Structure of smiles [FragFp] bit 9  | 0.002598 | 0.015081 | 0.050432 |
| Structure of smiles [FragFp] bit 90 | 0.062137 | -0.03696 | 0.029905 |
| Structure of smiles [FragFp] bit 91 | 0.049644 | -0.07313 | 0.021795 |
| Structure of smiles [FragFp] bit 92 | 0.045274 | -0.09562 | -0.00747 |
| Structure of smiles [FragFp] bit 93 | 0.043885 | -0.10483 | -0.00516 |
| Structure of smiles [FragFp] bit 94 | -0.00904 | 0.026708 | 0.101655 |
| Structure of smiles [FragFp] bit 95 | 0.037642 | 0.069642 | 0.023564 |
| Structure of smiles [FragFp] bit 96 | 0.050472 | -0.05451 | 0.046834 |
| Structure of smiles [FragFp] bit 97 | 0.035709 | -0.04265 | 0.075028 |
| Structure of smiles [FragFp] bit 98 | -0.0158  | 0.006608 | 0.128745 |
| Structure of smiles [FragFp] bit 99 | 0.042709 | -0.08189 | 0.028348 |

## Supplementary figures

Chemical space visualization using PCA

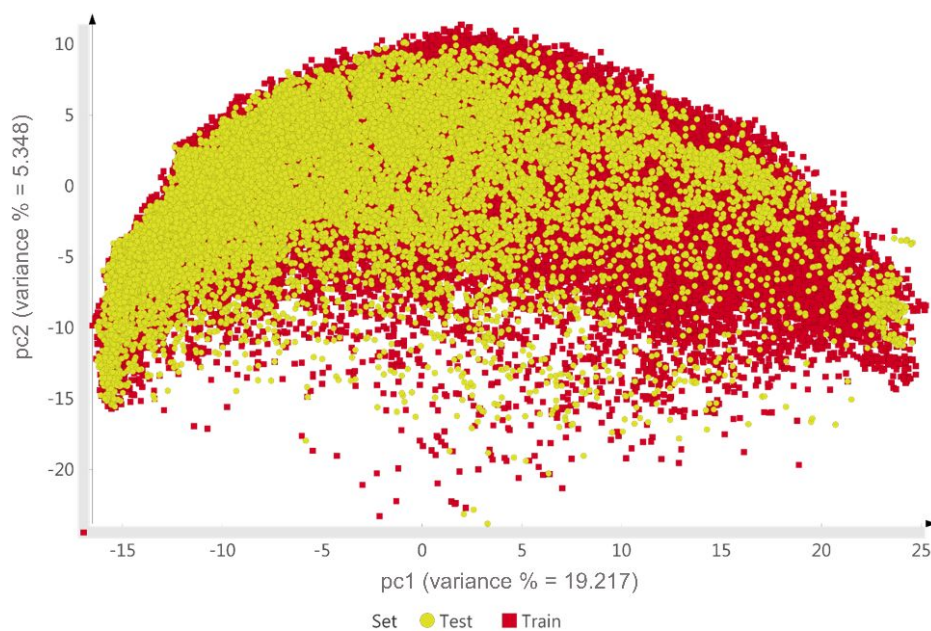

**Figure S1. The chemical space visualization using PCA.** Test set compounds were mostly mapped within the training set chemical space boundaries which confirms the prediction quality of the PCM and L-B model.

Scatter plot of PCA of screened drugs and active compounds of P14337 (dengue NS3 protein) from the training set

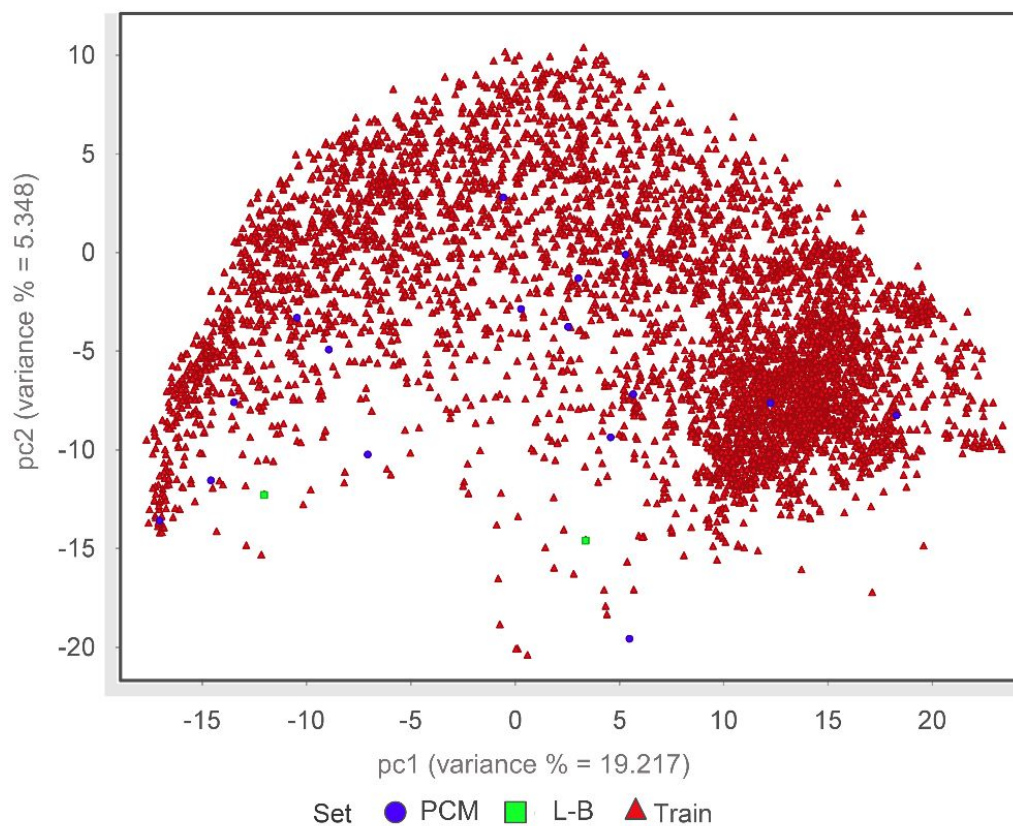

**Figure S2. Scatter plot of PCA of screened drugs and active compounds of P14337 (dengue NS3 protein) from the training set.** Drugs/substances which scored 0.99 from PCM model and  $\geq 0.5$  for L-B model were subjected to PCA to determine their position in the chemical space covered by the training set. Most of drugs predicted using PCM model (blue) lies within the training set boundaries, while the drugs predicted using the L-B model lies close to the compounds but not in the heavily populated area.
